# Supplementary material for: Mammalian NET-Seq Reveals Genome-wide Nascent Transcription Coupled to RNA Processing
Source: PubMed Central journal article supplement — Cell. 2015 Apr 23;161(3):526–40. doi: 10.1016/j.cell.2015.03.027 (PMC4410947; doi:10.1016/j.cell.2015.03.027), 2015-04-23
Supplement: mmc1.pdf [file mmc1.pdf]

| <b>TABLE S1</b>    |        |            |         |            |             |            |         |            |        |            |         |            |
|--------------------|--------|------------|---------|------------|-------------|------------|---------|------------|--------|------------|---------|------------|
|                    | CPSF73 |            | CstF-64 |            | CstF-64 tau |            | CPSF160 |            | CPSF30 |            | CF Im25 |            |
|                    | Sense  | Anti sense | Sense   | Anti sense | Sense       | Anti sense | Sense   | Anti sense | Sense  | Anti sense | Sense   | Anti sense |
| peak position (bp) | +80    | -160       | +1230   | -830       | +130        | -440       | +110    | -270       | +180   | -320       | +130    | -280       |

**CPA factor CLIP at TSS, Related to Figure S7C:** The positions (bp) of normalized CLIP density for sense and antisense strand on various CPA factors over TSS. The peak positions on the sense strand are highlighted in grey. Full details are available from authors.
